# Supplementary material for: Anti-Atopic Dermatitis Effect of Seaweed Fulvescens Extract via Inhibiting the STAT1 Pathway
Source: Hindawi journal article supplement (doi:10.1155/2019/3760934), 2019-03-17
Supplement: f1 [file 3760934.f1.pdf]

355

356

357

358

359

360 **Supplementary Materials**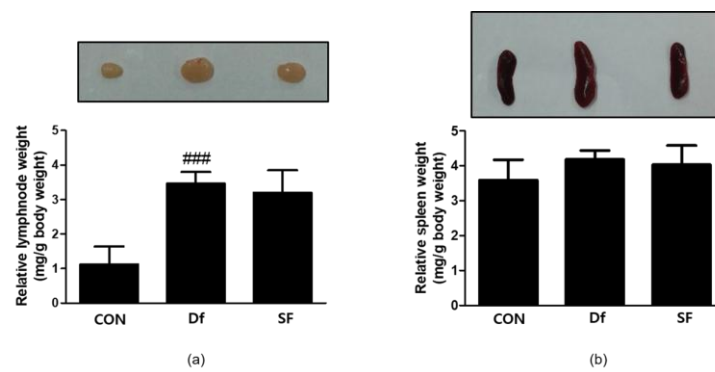

361

362 SUPPLEMENTARY FIGURE 1: Effect of SF on DF-induced systemic immunological abnormalities in NC/Nga  
363 mice. The representative image of lymph nodes (a) and spleen (b) from the mice and the weight. Values represent  
364 the mean  $\pm$  SD of three independent experiments. <sup>###</sup> $P < 0.001$  versus the control group.

365
